# Supplementary material
Source: PubMed Central journal article supplement (PMC3887864)
Supplement: molcell-35-5-396-5-supplementary.pdf [file molcell-35-5-396-5-supplementary.pdf]

## Supplement Figure 1

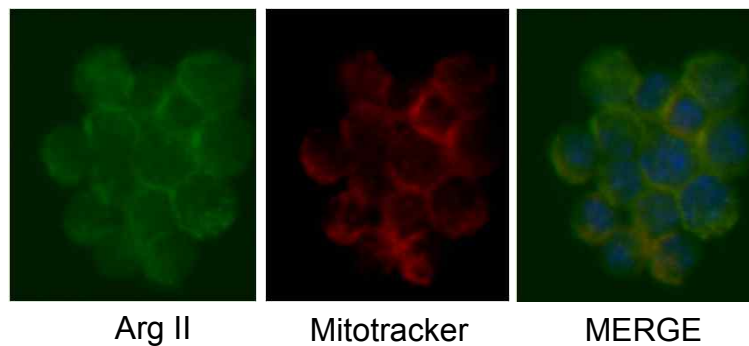

Fig. 1. Mitochondrial localization of arginase II in AdArgII-transfected RAW264.7 cells. Arginase II (green, left), mitotracker (red, middle), and merged images (right). Note that fluorescent images for arginase II was similar with mitotracker suggesting the mitochondrial localization of arginase II.
